# Supplementary material for: An instantly usable paper-based screen-printed solid-state KCl/Ag/AgCl reference electrode with long-term stability
Source: Royal Society of Chemistry journal article supplement (doi:10.1039/c5an00617a), 2015-01-01
Supplement: c5an00617a1.pdf [file c5an00617a1.pdf]

## Supplementary Information

### Experimental

#### *Materials and Regents*

The Ag ink (ECM-100 AF5000) and resist ink (TF-200 FRI) used were purchased from TAIYO INK MFG. CO., LTD. (Japan). A piece of filter paper (Munktell M-1, Germany) was used as the substrate. The water-repellent ink used (Fluorosurf FC-3030C-30) was purchased from Fluoro Technology Co. (Japan). The other reagents used were purchased from Wako Pure Chemical Industries (Japan).

#### *Equipment for screen-printing*

We used an LS-150TV screen printer (New Long Seimitsu Kogyo, Japan) to fabricate the reference electrode. Screen-pattern films designed using a CAD soft were ordered from Mitani Micronics (Japan). The Ag and Ag/AgCl pattern films were made of polyester mesh films (120  $\mu\text{m}$  in thickness). The resist film used was a metal-masked film (120  $\mu\text{m}$  in thickness). An ultrasonic homogenizer (UH-150, STM, Japan) was used to prepare the Ag/AgCl ink. Finally, we used an NR-2000 data logger (Keyence, Japan) to measure the open-circuit potentials.

#### *Processes for fabricating the water-repellent layer and the synthesized reference electrode*

Figure S1 shows the process for fabricating the synthesized paper-based reference electrode. First, a piece of filter paper was cut into dimensions of  $22 \times 65$  mm (a). Next, masking tape was put on the filter paper (b). The dimensions of the pattern formed using the masking tape is shown in Fig. S1. A layer of the water-repellent ink was then coated on the masked substrate and dried for 1 day (c). After the ink had dried, the masking tape was removed (d). A layer of the Ag/AgCl ink was printed on one side of the water-repellent-treated paper substrate (e). Next, a Ag conducting layer was formed by printing a layer of the Ag ink (f). The layers of the Ag and Ag/AgCl inks were cured at 120 °C for 20 min. Then, a layer of the resist ink was printed and cured at 100 °C for 20 min (g). Next, 0.5 mL of a saturated KCl solution, which consisted of 246 mg of KCl in 1 mL of ultrapure water, was dropped on the opposite side of the water-repellent-treated paper substrate three times (h). Finally, a layer of the resist ink was printed and dried at 120 °C for 20 min (i).

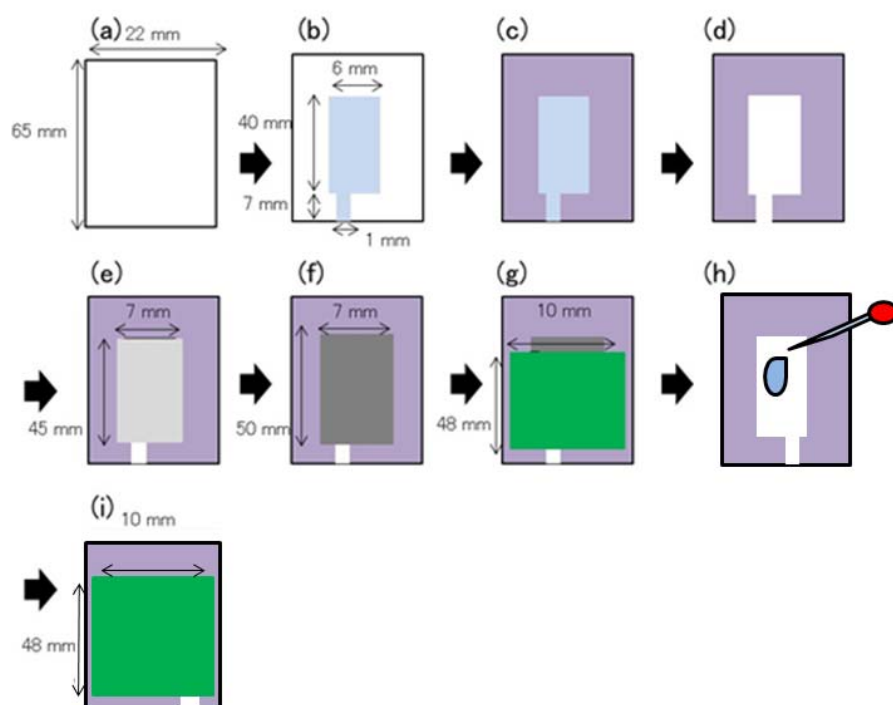

**SI Figure 1** Schematic showing the process for fabricating the synthesized Ag/AgCl reference electrode.

**SI Table 1**

Comparison of the performance of the synthesized reference electrode and those of the solid-state Ag/AgCl reference electrodes reported in the literature

| Fabrication technique                                           | Liquid junction     | Electrolyte layer                | Test solution                                                                   | Set-up time (min) | Stability (h)    | Ref.      |
|-----------------------------------------------------------------|---------------------|----------------------------------|---------------------------------------------------------------------------------|-------------------|------------------|-----------|
| Screen-printing                                                 |                     |                                  |                                                                                 |                   |                  |           |
| (Reference electrode synthesized in the current study)          | Paper               | Saturated KCl in paper substrate | 0.1 M Na <sub>2</sub> SO <sub>4</sub> solution                                  | <1                | 75               | This work |
| Photolithography, Electrochemical oxidation and screen-printing | Hydrophilic polymer | Saturated KCl, AgCl              | 50 mM NaOH/KH <sub>2</sub> PO <sub>4</sub> buffer containing 0.1 M KCl at pH7.0 | 240               | 120              | 9         |
| Screen-printing                                                 | None                | Saturated KCl in UV curing resin | 1.0 M KNO <sub>3</sub> solution (pH: N/A)                                       | 180               | 100              | 10        |
| Screen-printing                                                 |                     |                                  |                                                                                 |                   |                  |           |
| (Reference electrode synthesized in the current study)          | PDMS-PEG            | Saturated KCl in PDMS film       | Phosphate buffer solution at pH 7.0                                             | 120               | Longer than 1680 | 14        |
